# Supplementary material for: Population Structure, and Selection Signatures Underlying High-Altitude Adaptation Inferred From Genome-Wide Copy Number Variations in Chinese Indigenous Cattle
Source: Front Genet. 2020 Feb 14;10:1404. doi: 10.3389/fgene.2019.01404 (PMC7033542; doi:10.3389/fgene.2019.01404)
Supplement: Supplementary file 2 [file Table_2.xls]

## Sheet: Table S2
Table S2 Infromation of primers for qPCR validations.
CNVR ID	Chr.	Primer ID	Left position (bp)	Right position (bp)	Amplication Length (bp)	Forward primer sequence (5'-3')	Reverse primer sequence (5'-3')
CNVR232	1	p232	93731032	93731227	196	ATTCTCCCATTCTGGCTCA	GAACCCTAAAAGTATGGC
CNVR1251	5	p1251	117455153	117455470	318	CAAGATGTCACCGCAGAA	TCAGGGAAAGGTAGGCAC
CNVR1027	5	p1027	102808109	102808356	248	AGGGACAGTGAAGACAAC	GTGATGGAATGAGGGTGA
CNVR3663	8	p3663	12497977	12498174	198	TGTTTCCGACCTCTTGTGAC	GGGCTTCCCAGTTGATGC
CNVR1960	12	p1960	72748941	72749124	184	CAATCCCCCTTCCTACTG	ACTCCTACCTCTGTCCCT
CNVR2456	17	p2456	25912914	25913169	256	TCCCTGTGTTCTATCCTG	GGTGAGTGAAAGCCATTA
CNVR2853	22	p2853	60199488	60199753	266	TGAGGAGGTGAAATAGCGG	TAAAGGGCAAATCCAGTA
Reference	20	BTF3	8042699	8042861	163	GGCAGCAAACACTTTCACCATT	AGCAAAACCGCTACTAGCAAACTC
Note: Positions are based on the UMD3.1 assembly of the bovine genome.
